# Supplementary material for: Photoshop Elements 7 for Windows Essential Training
Source: MDPI journal article supplement (doi:10.3390/nano12081362), 2008-10-10
Supplement: s1 [file s1]

## Supplementary Data

# Aerosol–Cell Exposure System Applied to Semi-Adherent Cells for Aerosolization of Lung Surfactant and Nanoparticles Followed by High Quality RNA Extraction

**Mélanie M. Leroux<sup>1,\*†</sup>, Romain Hocquel<sup>1</sup>, Kevin Bourge<sup>1</sup>, Boštjan Kokot<sup>2</sup>, Hana Kokot<sup>2</sup>, Tilen Koklič<sup>2</sup>, Janez Štrancar<sup>2</sup>, Yaobo Ding<sup>3</sup>, Pramod Kumar<sup>3</sup>, Otmar Schmid<sup>3</sup>, Bertrand H. Rihn<sup>1</sup>, Luc Ferrari<sup>1</sup> and Olivier Joubert<sup>1</sup>**

<sup>1</sup> Université de Lorraine, CNRS, IJL, F-54000 Nancy, France ; romain.hocquel@univ-lorraine.fr (R.H.);

kevin.bourge@univ-lorraine.fr (K.B.); bertrand.rihn@univ-lorraine.fr (B.H.R.); luc.ferrari@univ-lorraine.fr

(L.F.); olivier.joubert@univ-lorraine.fr (O.J.)

<sup>2</sup> Jožef Stefan Institute, Department of Condensed Matter Physics, 1000 Ljubljana, Slovenia;

bostjan.kokot@ijs.si (B.K.); hana.kokot@ijs.si (H.K.); tilen.koklic@ijs.si (T.K.); janez.strancar@ijs.si (J.Š)

<sup>3</sup> Institute of Lung Health and Immunity, Helmholtz Zentrum München, German Research Center for

Environmental Health, 85764 Neuherberg, Germany; dyb450303@gmail.com (Y.D.);

pramod.kumar@helmholtz-muenchen.de (P.K.); otmar.schmid@helmholtz-muenchen.de (O.S.)

\* Correspondence: melanie.leroux.pro@gmail.com and melanie.lovera-leroux@univ-lorraine.fr

† Institut Jean Lamour, UMR CNRS 7198, 2 Allée André Guinier BP 50840, 54011 Nancy, France.

A) Photograph of the nebulizer/tube construction

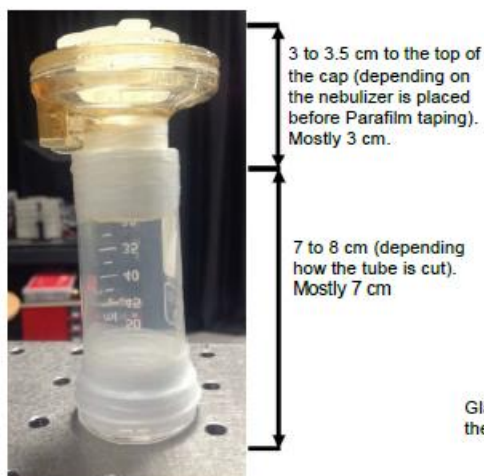

B) Schematics of the Nebulizer/tube/ $\mu$ -dish construction

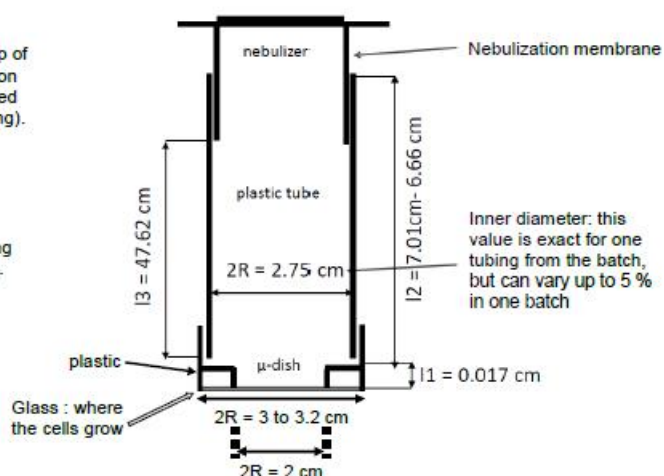

C) Picture of the nebulizer/tube/ $\mu$ -dish setup on the microscope

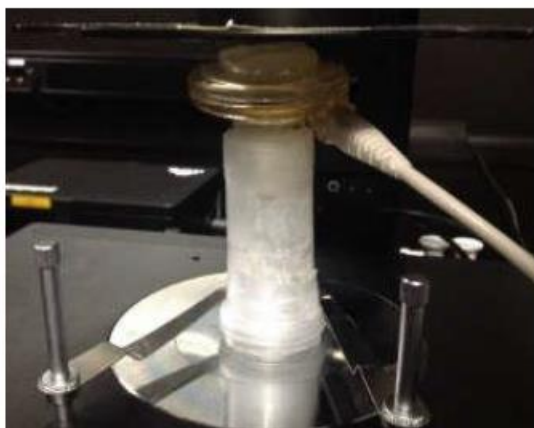

D) Nebulization of 0.5 monolayer of surfactant

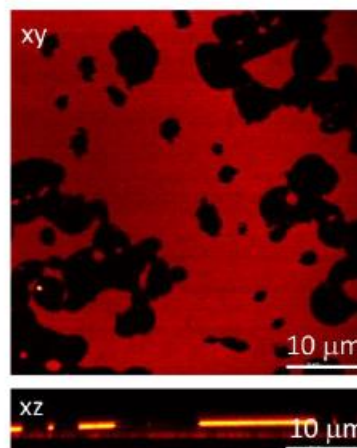

**Figure S1:** Nebulizer/tube/ $\mu$ -dish setup for microscopy.

The estimation of the fraction of nebulized surfactant which reaches the sample was performed by nebulizing 12  $\mu\text{g}$  of surfactant (100  $\mu\text{L}$  of 0.12  $\mu\text{g}/\text{mL}$  surfactant), resulting in approximately 0.5 monolayers of surfactant on the sample (red area on Supp Data 1D). Considering that a lipid monolayer has a surface area of 500  $\text{m}^2/\text{g}$  and the surface of the sample was 3.5  $\text{cm}^2$ , the mass of the 0.5 monolayer deposited on the sample was 0.3  $\mu\text{g}$ . This estimation was used to determine the amount of surfactant nebulized in other experiments as well.

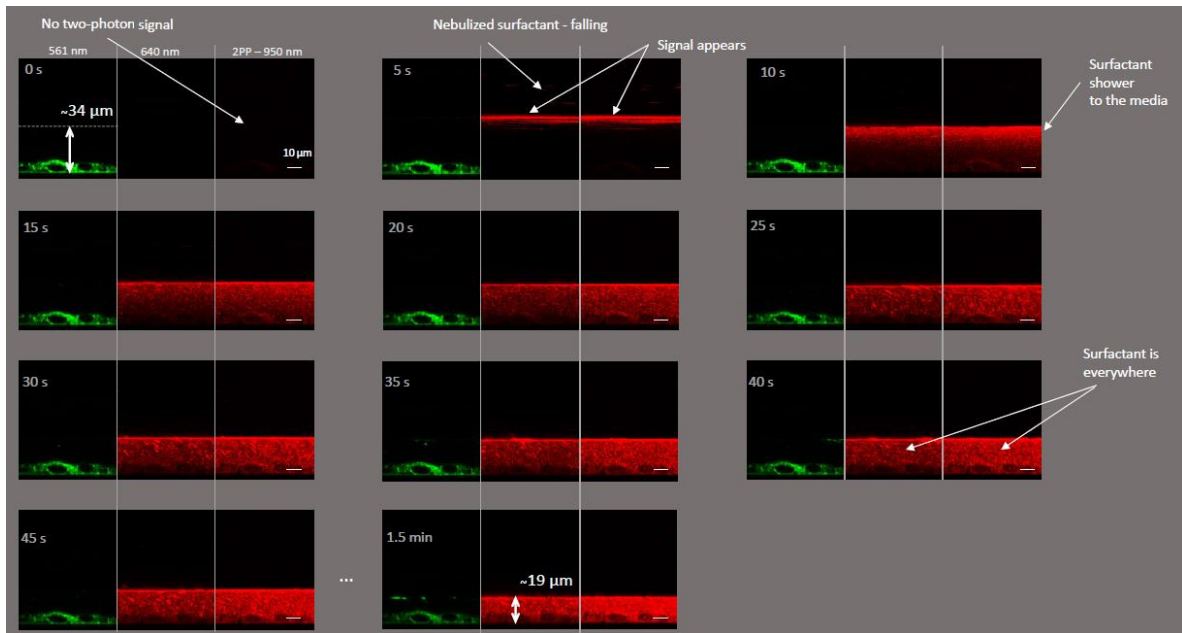

**Figure S2:** Time series of nebulizing Curosurf-StarRed, fluorescence microscopy at 561 nm, 640, and 950 nm. Most of the material is nebulized in the first 30 s, and the system settles in a few minutes;

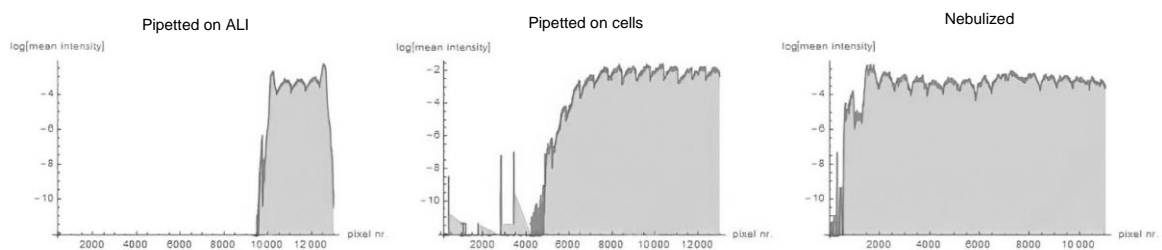

**Figure S3:** Intensity distribution of Curosurf-StarRed fluorescence, under different conditions
